# Supplementary material for: Europium-doped hybrid nano-complexes: a potential strategy for metastasis prevention in osteosarcoma
Source: Royal Society of Chemistry journal article supplement (doi:10.1039/d3ma00939d), 2024-01-01
Supplement: d3ma00939d1.pdf [file d3ma00939d1.pdf]

## **Supplementary Information**

### **Europium-doped Hybrid Nano-complexes: a Potential Strategy for Metastasis Prevention in Osteosarcoma**

Yu-Chi Wang<sup>a, \*</sup>, Fu-I Tung<sup>b, c, \*</sup>, Zheng-Ying Sung<sup>a</sup>, Mei-Hsiu Chen<sup>d, e</sup>, Ming-Hong Chen<sup>f</sup>, Tse-Ying Liu<sup>a</sup>

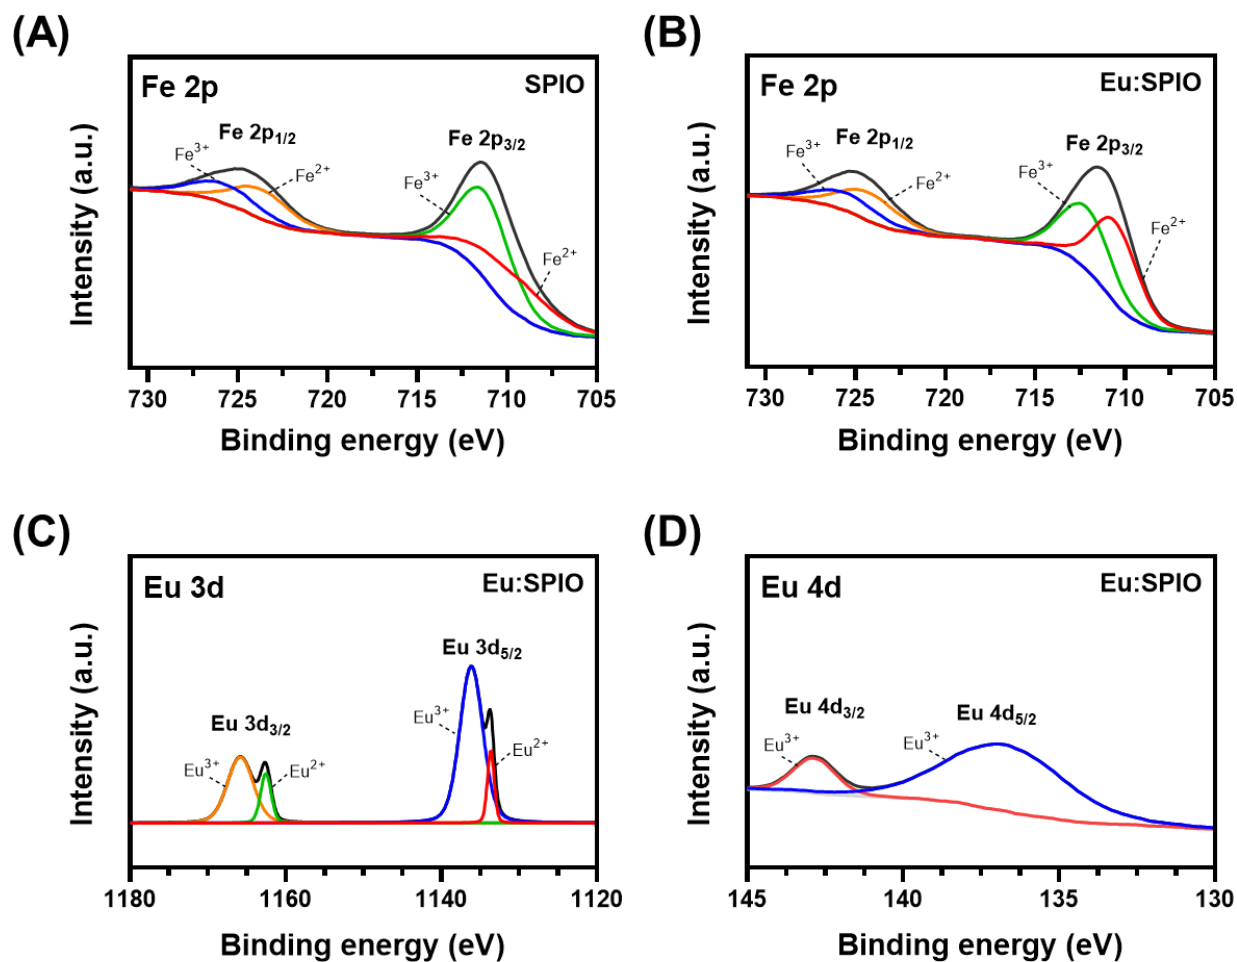

**Fig. S1** High-resolution XPS spectra of Fe 2p in (A) SPIO and (B) Eu:SPIO nanocrystals, and (C) Eu 3d and (D) Eu 4d in Eu:SPIO nanocrystals.

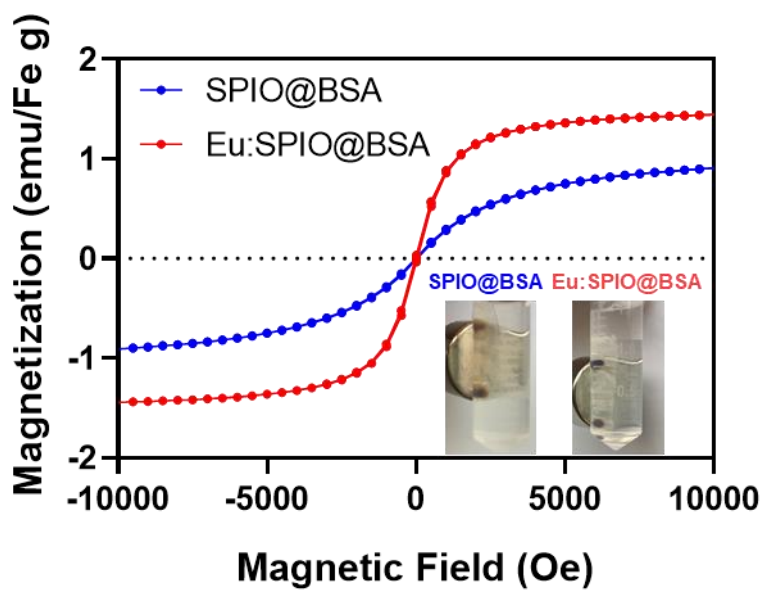

**Fig. S2** Magnetization–magnetic field strength (M–H) curves of SPIO@BSA and Eu:SPIO@BSA complexes were normalized based on their Fe content.

**Table S1** Atomic percentage (at%) of SPIO nanocrystals, Eu:SPIO nanocrystals, SPIO@BSA NPs, and Eu:SPIO@BSA NPs. The amount of Fe and Eu elements in the SPIO nanocrystals, Eu:SPIO nanocrystals, SPIO@BSA NPs, and Eu:SPIO@BSA NPs were calculated using the data from inductively coupled plasma mass spectrometry (ICP-MS).

|                    | <b>Fe</b> | <b>Eu</b> |
|--------------------|-----------|-----------|
| <b>SPIO</b>        | 100       | 0         |
| <b>Eu:SPIO</b>     | 87.11     | 12.89     |
| <b>SPIO@BSA</b>    | 100       | 0         |
| <b>Eu:SPIO@BSA</b> | 90.75     | 9.25      |

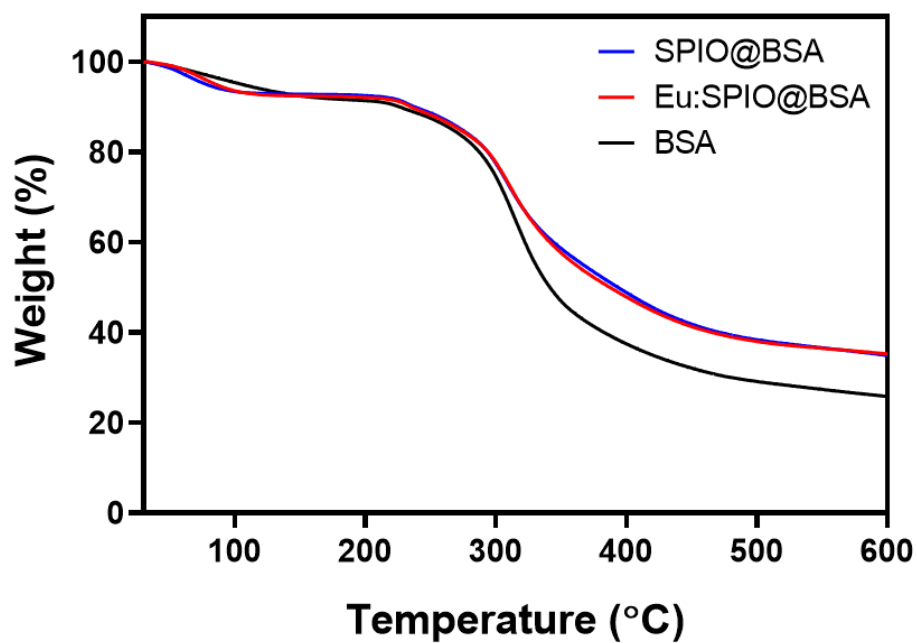

**Fig. S3** Thermogravimetric analysis (TGA) curves of SPIO@BSA complexes, Eu:SPIO@BSA complexes, and BSA. The weight loss of nanovehicles and BSA was recorded in the temperature range of 30–600 °C with a heating rate of 10 °C/min under a nitrogen atmosphere.

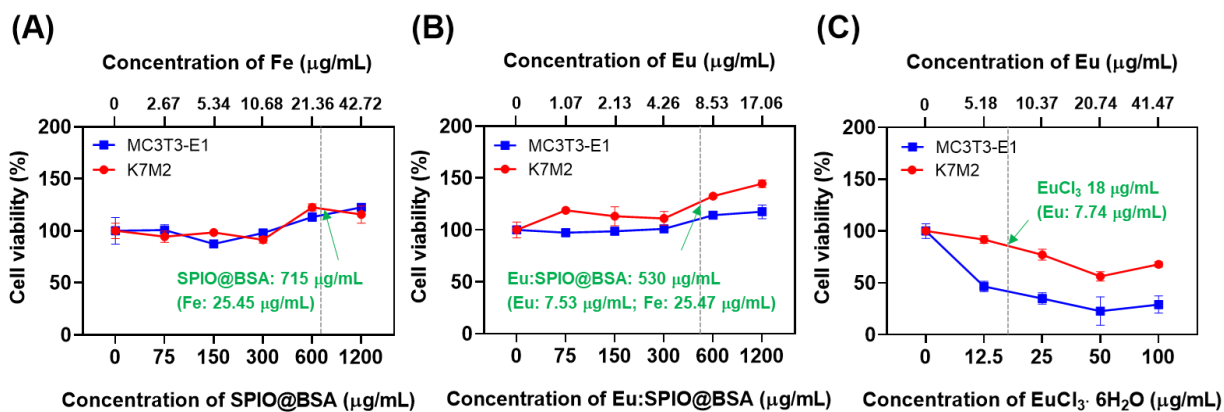

**Fig. S4** Effect of (A) SPIO@BSA complexes, (B) Eu:SPIO@BSA complexes, and (C)  $\text{EuCl}_3 \cdot 6\text{H}_2\text{O}$  on cell viability of K7M2 and MC3T3-E1 cells at 24 h. Cell viability was evaluated using the PrestoBlue cell viability reagent.

### ***In vitro* cell viability assay**

The MC3T3-E1 and K7M2 cells ( $3 \times 10^4$  cells per well) were seeded in 24-well plates and incubated for 24 h. Fresh media containing different concentrations of SPIO@BSA complexes (0–1200  $\mu\text{g}/\text{mL}$ ), Eu:SPIO@BSA complexes (0–1200  $\mu\text{g}/\text{mL}$ ) and  $\text{EuCl}_3 \cdot 6\text{H}_2\text{O}$  (0–100  $\mu\text{g}/\text{mL}$ ) was incubated with cells for 24 h. After removing the medium, cells were washed twice with PBS and incubated with 5% Presto Blue reagent for 30 min. The resulting solution was detected at 560 nm excitation and 590 nm emission wavelengths using a Tecan Infinite 200 plate reader (Infinite<sup>®</sup> 200 PRO, TECAN).

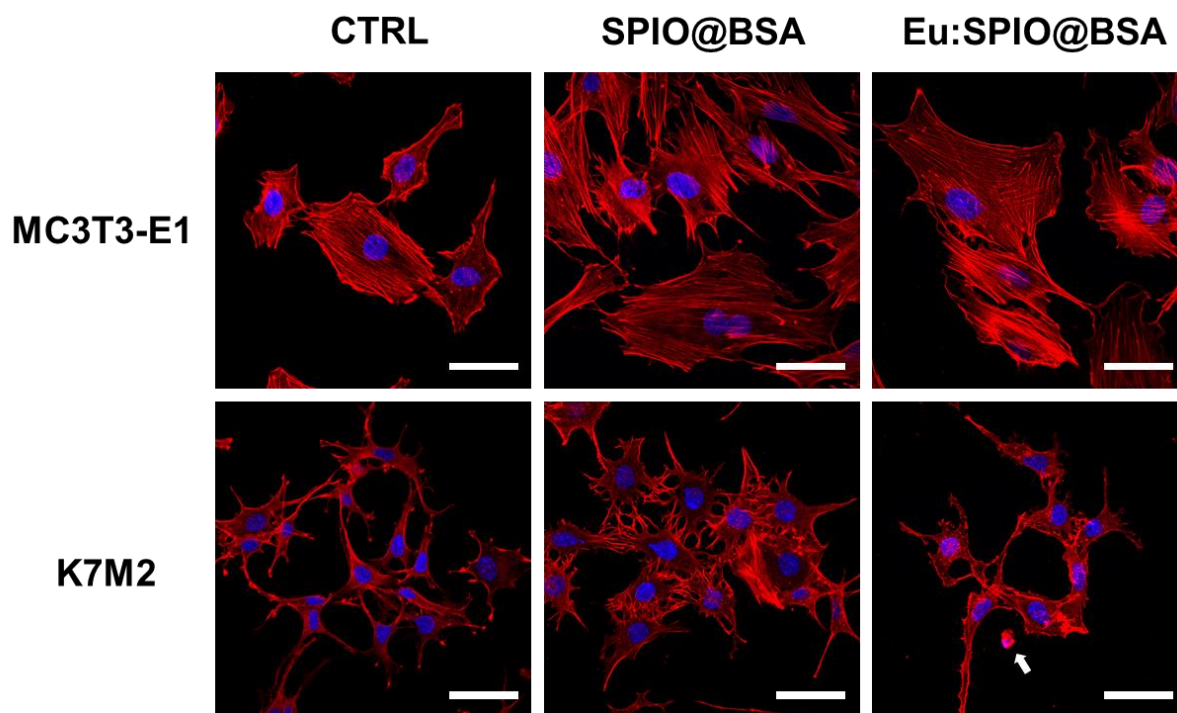

**Fig. S5** Confocal images of MC3T3-E1 and K7M2 cells stained with DAPI (blue) and Alexa Fluor™ 568 Phalloidin (red). The main objective of this experiment was to showcase the natural cell morphologies without interference from the signals of SPIO@FITC-BSA and Eu:SPIO@FITC-BSA nano-complexes (depicted as the green signals in **Fig. 2**). Comparing the data in **Fig. 2** and **Fig. S5** reveals a noticeable change in cell morphology, attributed to the uptake of Eu:SPIO@FITC-BSA complexes (indicated by the white arrow). Scale bar = 50  $\mu\text{m}$ .



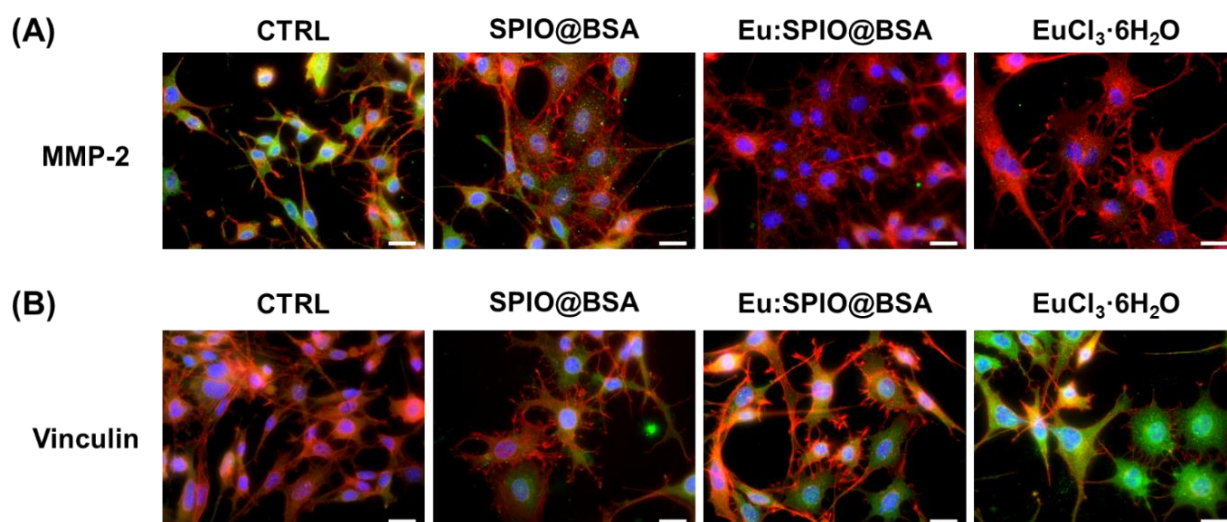

**Fig. S6** The expression of (A) matrix metalloproteinase 2 (MMP-2) and (B) vinculin in K7M2 cells. The cells were incubated with SPIO@BSA complexes, Eu:SPIO@BSA complexes, and EuCl<sub>3</sub>·6H<sub>2</sub>O for 24 h, and the expression of MMP-2 and vinculin was analyzed using immunofluorescence staining. Nuclei and actin cytoskeleton were stained with DAPI (blue) and Alexa 594-labeled Phalloidin (red), respectively. MMP-2 and vinculin were stained with Alexa 488-labeled Phalloidin (green). Scale bar = 40 μm. Images of the cells were captured using a digital camera interfaced with a fluorescence microscope.

## **Immunofluorescence assay**

To observe the expression of MMP-2 and vinculin, K7M2 cells were seeded onto 18 mm glass slides in 12-well culture plates at a density of  $5 \times 10^4$  cells per well. The cells were then incubated with or without samples (i.e., SPIO@BSA complexes, Eu:SPIO@BSA complexes, and  $\text{EuCl}_3 \cdot 6\text{H}_2\text{O}$ ) for 24 h. The concentrations of SPIO@BSA, Eu:SPIO@BSA complexes, and  $\text{EuCl}_3 \cdot 6\text{H}_2\text{O}$  were 715  $\mu\text{g/mL}$ , 530  $\mu\text{g/mL}$ , and 18  $\mu\text{g/mL}$ , respectively. The concentrations of SPIO@BSA and Eu:SPIO@BSA complexes were selected for the similar Fe content. In addition, Eu:SPIO@BSA complexes and  $\text{EuCl}_3 \cdot 6\text{H}_2\text{O}$  with the similar Eu content were selected. After 24 h, the cells were scratched with a 1 mL pipette tip and cultured for 24 h. Cells were washed twice with PBS, fixed with 4% paraformaldehyde for 15 min, and then permeabilized with Triton X-100 for 5 min. Samples were stained with primary antibodies MMP-2 (GTX104577) and vinculin (GTX113294) (1:500) at 4 °C overnight and Alexa Fluor 594 fluorescence secondary antibody (Abcam, ab150080) for 1 h at room temperature. Finally, the samples were stained with Fluoroshield DAPI (GeneTex, GTX30920) and Alexa Fluor 488 conjugated phalloidin (A12379). The distribution and expression of the biomarkers (MMP-2 and vinculin) were observed using a fluorescence microscope.

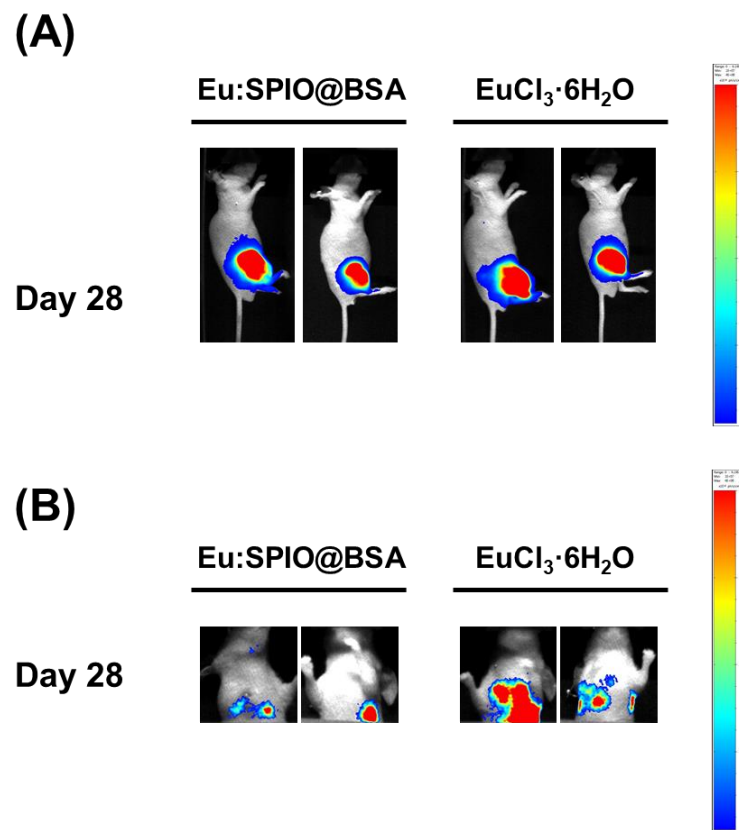

**Fig. S7** Therapeutic efficacy of Eu:SPIO@BSA complexes and EuCl<sub>3</sub>·H<sub>2</sub>O in mice on day 28. The *in vivo* imaging system (IVIS) images of (A) the leg and (B) the lungs.
